1  
2  
3  
4  
5  
6  
7  
8  
9  
10  
11  
12  
13  
14  
15  
16  
17  
18  
19  
20  
21  
22  
23  
24  
25

**AT6SS trans-kingdom effector  
is required for the delivery of  
a novel antibacterial toxin in *Pseudomonas aeruginosa***

Benjamin Berni<sup>1</sup>, Chantal Soccia<sup>1</sup>, Djermoun Sarah<sup>1</sup>, Ize Bérengère<sup>1</sup> and Sophie  
Bleves<sup>1\*</sup>

<sup>1</sup>LISM (Laboratoire d'Ingénierie des Systèmes Macromoléculaires-UMR7255), IMM (Institut  
de Microbiologie de la Méditerranée), Aix-Marseille Univ and CNRS, 31 chemin J. Aiguier, Marseille  
13402 Cedex 20, France.

\*Corresponding author: [bleves@imm.cnrs.fr](mailto:bleves@imm.cnrs.fr), phone +33491164695, fax +33491712124

## 26 **Abstract**

27 *Pseudomonas aeruginosa* has evolved multiple strategies to disarm and take  
28 advantage of its host. For this purpose this opportunist pathogen has particularly developed  
29 protein secretion in the surrounding medium or injection into host cells. Among this, the Type  
30 VI Secretion System (T6SS) is utilized to deliver effectors into eukaryotic host as well as  
31 target bacteria. It assembles into a contractile bacteriophage tail-like structure that functions  
32 like a crossbow, injecting an arrow loaded with effectors into the target cell. The repertoire of  
33 T6SS antibacterial effectors of *P. aeruginosa* is remarkably broad to promote environmental  
34 adaptation and survival in various bacterial communities, and presumably in the eukaryotic  
35 host too.

36 Here we report the discovery a novel pair of antibacterial effector and immunity of *P.*  
37 *aeruginosa*, Tle3 and Tli3. Tli3 neutralizes the toxicity of Tle3 in the periplasm to protect  
38 from fratricide intoxication. The characterization of the secretion mechanism of Tle3 indicates  
39 that it requires a cytoplasmic adaptor, Tla3, to be targeted and loaded onto the VgrG2b spike  
40 and thus delivered by the H2-T6SS machinery. Tla3 is different from the other adaptors  
41 discovered so far, and defines a novel family among T6SS.

42 Interestingly this led us to discover that VgrG2b that we previously characterized as an  
43 anti-eukaryotic effector possesses an antibacterial activity as well, as it is toxic towards  
44 *Escherichia coli*. VgrG2b is thus a novel trans-kingdom effector targeting both bacteria and  
45 eukaryotes. VgrG2b represents an interesting target for fighting against *P. aeruginosa* in the  
46 environment and in the context of host infection.

## 47 **Keywords**

48 Virulence, secretion, bacterial competition, VgrG, Tle

## 49 **Highlights**

- 52 • Tle3 and Tli3 are a novel pair of antibacterial toxin and immunity of *P. aeruginosa*
- 53 • Tla3 recruits Tle3 in the cytoplasm, and targets it to VgrG2b
- 54 • VgrG2b is required for Tle3 delivery into target bacteria by the H2-T6SS
- 55 • Tla3 defines a novel type of T6SS adaptor with a DUF2875
- 56 • VgrG2b is a new trans-kingdom effector targeting both bacteria and eukaryotes

## 57 **Abbreviations**

58 T6SS: Type VI secretion system  
59 Tle: Type VI lipase effector  
60 Tli: Type VI lipase immunity  
61 1914Tla: Type VI lipase adaptor  
62

## 63 **Introduction**

64 *Pseudomonas aeruginosa* is one of the most virulent opportunistic pathogens, being  
65 responsible for various diseases such as acute infections of lungs and burned skin that can  
66 lead to septicemia more particularly in immunocompromized patients, or broncho-alveolar  
67 colonization in Cystic Fibrosis sufferers. *P. aeruginosa* has been classified in 2017 as critical  
68 by the WHO in the top three list of antibiotic resistant bacteria [1]. *P. aeruginosa* has  
69 developed various pathogenicity strategies among which protein secretion or protein delivery  
70 into target cells is key. Indeed this pathogen possesses 5 of the 6 secretion systems so far  
71 identified among Gram-negative bacteria, if we exclude the T9SS (Type IX Secretion System)  
72 restricted to one phylum, and remarkably in several copies for most of them [2].

73 The T6SS (Type VI Secretion System) was first discovered in the context of  
74 eukaryotic host infection [3][4] and later during bacterial competition [5], which seems to be  
75 its primary function [6]. The T6SS confers a fitness advantage (i) in environmental niches  
76 against rival bacteria (inter- and intraspecies competitiveness have been described) and (ii) in  
77 the eukaryotic host towards commensal bacteria [6]. Indeed recent studies have highlighted a  
78 novel role for T6SS-dependent antibacterial responses in interbacterial competition in the  
79 mammalian gut [7][8], suggesting that T6SSs may be important not only in shaping microbial  
80 community composition, but also in governing interactions between the microbiota and  
81 invading pathogens. Interestingly, several T6SSs are also known to target both cell type genus  
82 such as the T6SS of *Vibrio cholera* [4][9] and *P. aeruginosa* [10][11]. Even more remarkably,  
83 three T6SS effectors of *P. aeruginosa*, namely PldA (also called Tle5a), PldB (Tle5b) and  
84 TplE (Tle4) [12,13] have been called “trans-kingdom effectors” since these toxins can target  
85 both prokaryotic and eukaryotic cells [14]. Indeed toxins are usually directed against  
86 eukaryotic cells (like AB toxins or RTX pore-forming toxins) or against rival bacteria (like  
87 bacteriocins).

88           The T6SS functions as a dynamic contractile phage tail-like structure anchored in the  
89 bacterial cell envelope that delivers effector proteins directly into the target cell in a one-step  
90 manner. T6SS includes a contractile sheath that cover a nanotube of stacked Hcp topped with  
91 a membrane-puncturing spike made of VgrG and PAAR (proline-alanine-alanine-arginine  
92 repeat) proteins [15]. The sheath can contract and inject the arrow loaded with effectors into  
93 the target cell. Characterizing the repertoire of effectors delivered by the T6SS has  
94 highlighted a great diversity in terms of effector activities, host cell targets, and mode of  
95 recruitment by the T6SS machinery. In brief, there are two broad effector categories:  
96 the "specialized" effectors fused to components of the machinery (evolved VgrG, evolved  
97 PAAR and evolved Hcp have been described so far) and the "cargo" effectors [6]. The later  
98 are addressed to the T6SS machinery by binding directly one of the arrow components (VgrG,  
99 PAAR and Hcp) or by being targeted through cytoplasmic adaptor proteins also called  
100 chaperones. To date three families of adaptor have been described, the first one harboring a  
101 DUF4123 [16–19], the second a DUF1795 [20,21] and the third one a DUF2169 [22]. In line  
102 with this, many effector-encoding genes are found in close proximity to *vgrG*, *hcp*, *paar* or  
103 adaptor genes. Finally to protect themselves from self-intoxication or from antibacterial  
104 toxins injected by neighboring sibling cells, bacteria always synthesize immunity proteins,  
105 which are encoded by adjacent genes [23].

106           *P. aeruginosa* encodes three distinct T6SS loci, H1- to H3-T6SS. While H1-T6SS is  
107 only involved in antibacterial activity so far [24][25], H2-T6SS and H3-T6SS can target both  
108 bacterial and eukaryotic cells possessing even as said earlier trans-kingdom effectors [10–  
109 13,26,27]. We discovered the anti-eukaryotic function of the H2-T6SS machinery that  
110 promotes the uptake of *P. aeruginosa* by non-phagocytic cells [10]. The two phospholipases  
111 D mentioned earlier, PldA (Tle5a) and PldB (Tle5b), delivered respectively by H2-T6SS and  
112 H3-T6SS machineries, participate in the host kinase pathway highjacking that facilitates

113 further entry of *P. aeruginosa* [12]. The evolved VgrG2b effector [26] is delivered by H2-  
114 T6SS into epithelial cells where it targets the  $\gamma$ -tubulin ring complex, a microtubule-  
115 nucleating multiprotein complex to promote a microtubule-dependent internalization of *P.*  
116 *aeruginosa*. Finally TplE (Tle4), which is secreted by the H2-T6SS machinery, promotes  
117 autophagy in epithelial cells once localized to the endoplasmic reticulum [13]. Interestingly  
118 PldA (Tle5a), PldB (Tle5b) and TplE (Tle4) have also been identified as antibacterial  
119 phospholipases of the Tle (type VI lipase effectors) family [11]. They work by affecting  
120 membrane integrity of the rival bacteria [11–13]. More precisely, PldA degrades the major  
121 constituent of bacterial membranes, the phosphatidylethanolamine [11].

122 In the present study we have discovered a novel antibacterial toxin, Tle3 and its  
123 cognate immunity, Tli3, whose genes are encoded downstream of *vrgG2b*. By characterizing  
124 the secretion mechanism of Tle3 by H2-T6SS, we showed that it requires Tla3, a cytoplasmic  
125 adaptor of a unique family, to be targeted to the VgrG2b spike. Interestingly we also found  
126 that the C-terminal extension of VgrG2b is toxic towards *Escherichia coli* making VgrG2b a  
127 new trans-kingdom effector of *P. aeruginosa*.

128

## 129 **Results**

### 130 **Tle3 is a novel antibacterial toxin of *P. aeruginosa***

131 The analysis of the *vrgG2b* genetic environment revealed the presence of the PA0260  
132 gene encoding a protein with a  $\alpha/\beta$  hydrolase domain (PF00561) and a putative Ser-Asp-His  
133 catalytic triad used by various esterase enzymes and has thus been classified in the Tle3  
134 family of antibacterial Tle toxins [11] (Fig. 1A). The immunities of Tle proteins, which are  
135 lipolytic toxins active in the periplasm of the prey bacterium, are localized in or exposed to  
136 the periplasm where they neutralize the cognate toxin [11–13,29]. The two genes surrounding  
137 *tle3*, PA0259 and PA0261, are good candidates as Tle3 immunity. Indeed sequence

138 comparisons of PA0259 and PA0261 showed that PA0261 is homologous to Tsi6, the  
139 immunity protein of a H1-T6SS effector called Tse6, and PA0259 to TplEi (Tli4), the  
140 immunity of TlpE (Tle4), a H2-T6SS effector [13,30]. We used the SignalP 4.1 server [31] to  
141 predict the cellular localization of the two immunity candidates. While a Sec signal sequence  
142 is predicted at the N-terminal extremity of PA0261, the analysis of the PA0259 sequence did  
143 not reveal any. However three upstream ATG can be found in frame with the annotated ATG  
144 of PA0259 (Fig. 1 sup). The sequence of the proteins synthesized from the two first ATG  
145 (ATG<sub>1</sub> et ATG<sub>2</sub>) presents then a N-terminal signal peptide, while the protein synthesized from  
146 the last codon (ATG<sub>3</sub>) does not. Moreover a RBS (Ribosome Binding Sequence) can be found  
147 only upstream of ATG<sub>1</sub> and with a significant Kolaskar score that indicates a strong  
148 probability to be used as an initiation codon [32]. Altogether these data tend to indicate an  
149 incorrect annotation of the start codon of PA0259 and that ATG<sub>1</sub> should be considered for the  
150 initiation of PA0259 translation. Such a correction has been already seen for Tli5 (PA3488)  
151 the immunity protein of PldA (Tle5a) of *P. aeruginosa* [11]. In conclusion of this *in silico*  
152 analysis, the two putative immunities may harbor a Sec signal peptide that suggests a  
153 periplasmic localization in agreement with Tle3 activity in this compartment.

154         To demonstrate the antibacterial activity of Tle3 and to identify its immunity protein,  
155 we developed a heterologous toxicity assay in *E. coli* on the basis that Tle3 should be toxic  
156 when produced in the periplasm of *E. coli* and that it should be counteracted by the co-  
157 production of its immunity protein. In order to artificially address Tle3 to the periplasm of *E.*  
158 *coli* the *tle3* sequence has been cloned in frame with the sequence coding the PelB signal  
159 peptide on the pET22b vector under a P<sub>T7</sub> promoter. PA0259 from ATG<sub>1</sub> and PA0261 were  
160 respectively cloned in pRSF-DUET, a higher copy-number vector, to allow a maximal co-  
161 expression with *ss-tle3* in the *E. coli* BL21(DE3) pLysS strain. The correct production and  
162 localization of all the recombinant proteins in *E. coli* has been verified by western blot after

163 cell fractionation (Fig. 2 sup). The results presented in Figure 1B indicate that whereas the  
164 cytoplasmic production of Tle3 was not toxic, Tle3 targeting to the periplasm led to *E. coli*  
165 killing. Moreover while PA0259 had no effect, the coproduction of PA0261 in the periplasm  
166 protected the cells against the toxicity of Tle3. We verified that the sole overproduction of  
167 PA0259 and PA0261 was not toxic to *E. coli*. As PA0261 neutralized Tle3 toxicity, we called  
168 it “Tli3” for Type VI lipase immunity (Fig. 1A). During this study, we observed that the  
169 protection conferred by Tli3 coproduction could be sometimes partial and we solved this issue  
170 by cloning in tandem *tli3* and *tle3* on the same plasmid like they are organized on *P.*  
171 *aeruginosa* genome (Fig. 1B, line 8). The importance of this genetic link is the proof of the  
172 close connection between these two proteins as a pair of toxin-antitoxin.

173

#### 174 **Tli3 (PA0261) is the immunity protein of Tle3**

175 As the immunities bind specifically their effector, which is suggested by the release of  
176 Tle3 toxicity by Tli3, we tested the physical interaction between both proteins by co-  
177 purification with affinity chromatography (Fig. 2A). A cytoplasmic Strep-tagged version of  
178 Tli3 was engineered by fusing the tag to the mature domain of Tli3, lacking its signal peptide.  
179 The recombinant protein was coproduced in *E. coli* BL21(DE3) pLysS with the cytoplasmic  
180 His<sub>10</sub>-tagged Tle3. The bacterial lysate was loaded to a StrepTactin matrix (see Materials and  
181 Methods section), and Tli3<sup>C</sup><sub>Strep</sub> was eluted with desthiobiotin. The presence of Tle3<sup>C</sup><sub>His</sub> was  
182 controlled in the elution fraction with anti-His antibodies. As showed in Fig. 2A, Tle3<sup>C</sup><sub>His</sub> was  
183 found in the eluted fraction only upon coproduction with Tli3<sup>C</sup><sub>Strep</sub> (left panel). Indeed when  
184 produced alone in *E. coli* Tle3<sup>C</sup><sub>His</sub> was not purified by affinity chromatography (right panel).  
185 As expected for an immunity protein, Tli3 directly interacts with Tle3.

186 To go further into Tli3 characterization we chose to determine its cellular localization  
187 in *P. aeruginosa*. All the immunity proteins identified so far for Tle proteins are localized in

188 the periplasm or associated to the periplasmic side of the outer membrane [11–13,29] in order  
189 to counteract their cognate toxin. A chromosomally encoded Tli3<sub>V5</sub> translational fusion was  
190 engineered in order to specifically immunodetect the protein in *P. aeruginosa* (Supplementary  
191 Table 1). After fractionation of *P. aeruginosa* (Fig. 2B), Tli3 was readily observed in the  
192 same fraction as DsbA that catalyzes intrachain disulfide bond formation as peptides emerge  
193 into the periplasm. This indicates a periplasmic localization for Tli3 in *P. aeruginosa* in  
194 agreement with the presence of a Sec signal peptide and our working hypothesis suggesting  
195 an immunity function.

196

### 197 **Tle3 interaction network**

198 To further characterize Tle3, we performed a bacterial two-hybrid (BACTH) assay  
199 with the other gene products of the *vgrG2b* operon hypothesizing that a genetic link could  
200 reflect protein-protein interaction. The sequences coding PA0259 and Tli3 (PA0261) after  
201 their signal sequences and Tle3 were cloned downstream and upstream the T18 or T25  
202 domains of the *Bordetella adenylate* cyclase. Because of the high molecular weight of  
203 VgrG2b and since the interaction of another Tle with a VgrG in entero-aggregative *E. coli*  
204 (EAEC) was previously delimited to the C-terminal domain of VgrG [29], we cloned the  
205 sequences encoding the C-terminal extension (domains 1, 2 and 3) and a truncated version  
206 harboring only the DUF2345 and the transthyretin-like (TTR) domains (domains 1 and 2) of  
207 VgrG2b downstream the T18 and T25 domains (Fig. 3A).

208 Unexpectedly the sole interaction revealed by the BACTH assay for Tle3 was with  
209 PA0259 (Fig. 3B) since only the T18/T25-Tle3 and T18/T25-PA0259 fusion proteins  
210 coproduction activated the expression of the reporter gene. This assay did not confirm the  
211 interaction between Tle3 and Tli3 observed by copurification, and did not evidence an  
212 interaction with VgrG2b. Interestingly Tle3 and PA0259 did not interact anymore when they



213 were fused upstream the T18 and T25 domains suggesting that both proteins interact via their  
214 C-terminal domains (Fig. 3A Sup). To go further in characterizing the interaction between  
215 Tle3 and PA0259, we constructed truncated variants taking into account their domain  
216 organization (Fig. 3 A). We further delimited the interacting domain of Tle3 to its extreme  
217 C-terminus (the DUF3274 domain) since only the truncated T18-Tle3D2 construct still  
218 interacts with T25-PA0259 (Fig. 3C). We did not find the domain of interaction within  
219 PA0259 as none of the DUF2875 domains alone interacts with Tle3 or this may suggest that  
220 both of them are required for the interaction (Fig. 3C).

221 Next, we took advantage of all the constructs we made to test other interactions. The  
222 BACTH assay also showed that PA0259 interacts with both forms of the VgrG2b C-terminal  
223 extension (Fig. 3B). The domain of interaction on VgrG2b is thus at least constituted by the  
224 DUF2345 and TTR domains. We also observed that PA0259 at least dimerizes since all the  
225 PA0259 constructs interact with each other whatever the orientation of PA0259 (Fig. 3B, 3D,  
226 Fig. 3B Sup). VgrG2b and Tli3 (PA0261) are also able to homomultimerize since all the  
227 constructs interact with each other (Fig. 3D, Fig. 3B Sup).

228 Taking into account the interactions revealed by the BACTH assay, we propose that  
229 the Tle3 toxin can be addressed to the H2-T6SS machinery VgrG2b component via PA0259.  
230 We thus named PA0259 “Tla3” for Type VI lipase adaptor protein.

231

### 232 **Tla3 (PA0259) characterization**

233 To gain insight into the role of Tla3 during Tle3 secretion, we first validated the  
234 interactions of Tla3 with Tle3 and VgrG2b by a complementary approach of co-purification  
235 by affinity chromatography. Two different tagged versions of Tla3 were engineered by fusing  
236 a Strep-tag or a 10His-tag to the mature domain of Tla3 this leading to cytoplasmic tagged  
237 Tla3 proteins. The recombinant Tla3<sup>C<sub>Strep</sub></sup> was coproduced in *E. coli* BL21(DE3) pLysS with

238 Tle3<sup>C<sub>His</sub></sup>, and the Tla3<sup>C<sub>His</sub></sup> with 3 recombinant forms of Strep-tagged VgrG2b consisting in the  
239 full-length VgrG2b, or VgrG2b truncated for the extreme C-terminus (deletion of domain 3 in  
240 Fig. 3A) or VgrG2b truncated for the extreme C-terminus and the TTR domain (deletion of  
241 domains 2 and 3 in Fig. 3A). We initially tried with His-tagged VgrG2b but a problem of  
242 protein instability led us to shift for Strep-tagged VgrG2b. The bacterial lysates were loaded  
243 on a StrepTactin matrix, and Tla3<sup>C<sub>Strep</sub></sup> or the three recombinant VgrG2b<sub>Strep</sub> were eluted with  
244 desthioiotin. The presence of Tle3<sup>C<sub>His</sub></sup> and of Tla3<sup>C<sub>His</sub></sup> was visualized in the elution fractions  
245 with anti-His antibodies. As shown in Fig. 4A, Tle3<sup>C<sub>His</sub></sup> was found in the eluted fraction upon  
246 coproduction with Tla3<sup>C<sub>Strep</sub></sup>. We observed that Tla3<sup>C<sub>His</sub></sup> is copurified only upon coproduction  
247 with the full length VgrG2b (Fig. 4B) or the VgrG2b truncated for the extreme C-terminus  
248 (Fig. 4C). Indeed when produced alone (Fig. 4B) or with VgrG2b truncated for the extreme  
249 C-terminus and the TTR domain (Fig. 4D), Tla3<sup>C<sub>His</sub></sup> was not purified by affinity  
250 chromatography. Since VgrG2b truncated for the extreme C-terminus still copurified with  
251 Tla3 we can exclude that this domain is required for the interaction. This is in line with the  
252 BACTH assay that showed an interaction between Tla3 and a truncated VgrG2b consisting in  
253 only the DUF2345 and TTR domains (domains 1 and 2, Fig. 3A). Moreover, the deletion of  
254 the TTR domain affecting the copurification, one can conclude that this domain is key for the  
255 interaction. Taken together these data confirmed a direct interaction of Tla3 with Tle3 on one  
256 side and with VgrG2b on the other side. By taking into account the BACTH data and the  
257 copurification with two truncated forms of VgrG2b, the domain of interaction of VgrG2b  
258 with Tla3 can be delimited to the TTR domain.

259 We then analyzed the cellular localization of Tla3 in *P. aeruginosa* that, according to  
260 its interactions with Tle3 and VgrG2b, should be cytoplasmic. As for Tli3, we engineered a  
261 chromosomally encoded Tla3<sub>V5</sub> translational fusion (Supplementary Table 1). Tla3 was  
262 indeed immunodetected in the cytoplasmic fraction (Fig. 5A). One could note that in contrast

263 with our first hypothesis suggesting an incorrect start codon for *tla3* and our observation of  
264 the recombinant protein in the periplasm of *E. coli* (Fig. 1 Sup), Tla3 was totally absent from  
265 the periplasmic fraction of *P. aeruginosa*. To strengthen this result, each putative ATG was  
266 individually mutated on the chromosome of the PAO1 strain encoding the Tla3<sub>V5</sub> translational  
267 fusion (Fig. 5B). In agreement with its cytoplasmic localization in *P. aeruginosa*, Tla3 was  
268 only produced if the fourth ATG was intact. Accordingly the Tla3 protein synthesized from  
269 this ATG is not predicted to possess a N-terminal signal peptide (Fig. 1 Sup). In conclusion  
270 Tla3 is a cytoplasmic protein synthesized from the annotated translation start  
271 ([pseudomonas.com](http://pseudomonas.com)) and this localization is in agreement with a role in the targeting of the  
272 toxin to the secretion machinery.

273 Next, we asked whether Tla3 is specific for Tle3 or if it can be required for the  
274 secretion of other substrates of the H2-T6SS machinery. Since Hcp secretion is the hallmark  
275 of a functional secretion system, we studied the secretion of Hcp2b whose gene is upstream  
276 *vgrG2b* (Fig. 1A). Like Allsopp and colleagues (2017) we deleted the *rsmA* gene to enable  
277 Hcp2b production and thus secretion by a PAO1 strain encoding a Hcp2b<sub>His</sub> translational  
278 fusion (Fig. 5C, compare line 1 and 2). RsmA is a posttranscriptional regulator known to  
279 repress all three T6SS clusters of *P. aeruginosa* [33]. This results in a massive secretion since  
280 Hcp2b<sub>His</sub> can be observed in the extracellular protein samples by Coomassie-blue staining  
281 (Fig. 5C, lower panel). While Hcp2b<sub>His</sub> secretion was abolished in a *rsmA clpV2* mutant, we  
282 observed that Hcp2b<sub>His</sub> is still secreted in the absence of Tla3 (Fig. 5C, compare line 3 with  
283 line 4), suggesting that Tla3 is specific for the secretion of Tle3 but not for other H2-T6SS  
284 proteins. In line with this specific adaptor-toxin pair, Tla3<sup>C</sup><sub>Strep</sub> did not copurify TplE (Tle4),  
285 another antibacterial phospholipase delivered by the H2-T6SS machinery (Fig. 5D).

286 Finally as the interaction with a VgrG can suggest that Tla3 is itself a T6SS effector,  
287 we studied whether Tla3 is secreted by *P. aeruginosa*. To this end the *rsmA* gene was deleted

288 from the PAO1 strain encoding a Tla3<sub>V5</sub> translational fusion. Whereas Tla3<sub>V5</sub> was better  
289 produced upon *rsmA* deletion (Fig. 5E), this did not lead to immunodetection of Tla3<sub>V5</sub> in the  
290 extracellular medium although Hcp2b was readily observed by Coomassie-blue staining of  
291 the same samples. Tla3 is thus not an effector *per se*.

292 In conclusion the cytoplasmic localization of Tla3 in *P. aeruginosa* is appropriate with  
293 a recruiting role of Tle3 to the H2-T6SS machinery through an interaction with the TTR  
294 domain of VgrG2b. Tla3 is not co-secreted with Tle3. Tla3 role seems specific to Tle3 since it  
295 is not required for a functional H2-T6SS machinery and does not interact with TplE (Tle4),  
296 another H2-T6SS effector.

297

### 298 **Tle3 secretion mechanism**

299 In order to study the antibacterial role and the secretion of Tle3 by *P. aeruginosa*, we  
300 performed intra-species bacterial competition assays between *P. aeruginosa* strains. This  
301 consists in studying the survival of prey bacteria lacking the *tli3* immunity gene (by CFU  
302 counting of antibiotic resistant bacteria) co-cultivated 24 hours at 37°C on plate with various  
303 attackers. As immunity genes are essential genes (protection from fratricide intoxication),  
304 both toxin and immunity genes have been deleted in order to construct a viable  $\Delta tli3\Delta tle3$   
305 mutant strain (Supplementary Table 1). The figure 6 first confirms the antibacterial function  
306 of Tle3 and the immunity role of Tli3 since the growth of the immunity mutant was affected  
307 by the WT strain because it cannot resist Tle3 toxicity, while the  $\Delta tle3$  mutant had no effect  
308 (Fig. 6 compare line 1 with line 2). The use of the  $\Delta clpV2$  strain, a H2-T6SS mutant and of  
309  $\Delta vgrG2b$  and  $\Delta tla3$  mutants allowed to demonstrate that Tle3 is delivered to prey bacteria  
310 through the H2-T6SS machinery and confirms that VgrG2b and Tla3 participate in Tle3  
311 targeting to the H2-T6SS machinery (Fig. 6 compare line 1 with lines 4, 5 and 6). Indeed  
312  $\Delta clpV2$ ,  $\Delta vgrG2b$  and  $\Delta tla3$  mutants had no effect on the immunity mutant growth since they

313 cannot deliver Tle3 into prey bacteria. The complementation *in cis* of *tle3* and *tla3* deletions  
314 (the mutants have been constructed for this study) restored a WT phenotype (Fig. 6 compare  
315 line 2 with line 3, and line 6 with line 7) this demonstrating no polar effect on downstream  
316 genes. Furthermore the introduction of a wild-type copy of *tli3* at the *attB* site on *P.*  
317 *aeruginosa* chromosome of the  $\Delta tli3\Delta tle3$  mutant restores wild-type competition capacity to  
318 this strain (Fig. 4A Sup). This confirms that the absence of the immunity was responsible of  
319 the phenotypes observed for the  $\Delta tli3\Delta tle3$  strain (Fig. 6). Finally, the  $\Delta tla3$  mutant has been  
320 used as a prey and was not affected by the WT strain or any of the mutants excluding  
321 definitively a role of immunity as proposed by its annotation (Pseudomonas.com) and  
322 confirming its adaptor function (Fig. 4B Sup).

323 Taken together these results demonstrated that Tle3 is an effective H2-T6SS-  
324 dependent antibacterial toxin loaded onto the VgrG2b puncturing device via Tla3 and  
325 neutralized by Tli3 in resistant prey bacteria.

326

### 327 **VgrG2b is a trans-kingdom toxin**

328 A putative neutral zinc metallopeptidase domain has been predicted at the extreme C-  
329 terminus of VgrG2b by Pukatzki and colleagues [34] (Fig. 3A). This motif (Prosite PS00142,  
330 PFAM04298) consists in a metal-binding consensus motif HExxH, the two histidine residues  
331 being ligands of the catalytic  $Zn^{2+}$  and the glutamic acid residue involved in nucleophilic  
332 attack. As an effector with a protease activity can target both eukaryotic and bacterial proteins,  
333 we searched for an antibacterial activity of the VgrG2b C-terminal extension. To do this we  
334 performed the same heterologous toxicity assay in *E. coli* as with Tle3. As shown in figure 7,  
335 whereas the production of VgrG2b<sub>Cter</sub> in the cytoplasm did not impact *E. coli* growth, its  
336 periplasmic production killed *E. coli* (Fig. 7, compare line 2 and 5). Moreover substitution of

337 the histidine in position 935 and of the glutamic acid 936 for an alanine relieves VgrG2b<sub>Cter</sub>  
338 toxicity this showing that VgrG2b is a novel antibacterial protease active in the periplasm.

339

## 340 **Discussion**

341 Here we report the existence of a novel pair of antibacterial effector and immunity of  
342 the H2-T6SS of *P. aeruginosa*, Tle3 (PA0260) and Tli3 (PA0261), and we propose a  
343 chronology of Tle3 secretion process that includes a cytoplasmic adaptor protein, Tla3  
344 (PA0259) to load the toxin onto the VgrG2b spike (a model is proposed in Fig. 8). Through  
345 heterologous toxicity assay and bacterial competition, we show that Tle3 was toxic once  
346 delivered in the periplasm of prey bacteria and that Tli3 can neutralize the toxin in this  
347 compartment. Interestingly this led us to discover that VgrG2b that we previously recognized  
348 as an anti-eukaryotic effector possesses an antibacterial activity as well.

349 The VgrG-recruitment of cargo effectors has been previously evidenced for several  
350 antibacterial effectors among them two toxins of the Tle family, TseL (Tle2) of *V. cholerae*  
351 [16,17,35] and Tle1 of EAEC [29]. In both cases the *tle* genes were just downstream the *vgrG*  
352 genes like the organization of *vgrG2b* and *tle3* of *P. aeruginosa*. TseL and Tle1 have been  
353 shown to directly bind a dedicated VgrG, VgrG3 and VgrG1 respectively [29,35]. The  
354 domain of interaction within EAEC VgrG1 has been delimited to the TTR domain and may  
355 also include the DUF2345, both of which are present in the *P. aeruginosa* VgrG2b. In line  
356 with this, and despite Tle3 requiring an adaptor to be targeted to VgrG2b, we have shown that  
357 Tla3 interacts with the TTR domain of VgrG2b. Taken together these data demonstrate that  
358 TTR domains of VgrGs are involved in recruitment and transport of Tle effectors, directly or  
359 through adaptor. Likewise C-terminal extensions of VgrG1 and VgrG2 of *Agrobacterium*  
360 *tumefaciens* were identified as specifically required for the delivery of each cognate DNase

361 toxins, named Tde1 and Tde2 respectively [22]. C-terminal domains of VgrGs can thus be  
362 considered more generally as specificity determinants for T6SS effector loading and transport.

363 Interestingly TseL of *V. cholerae* requires also Tap-1 (Tec) as an adaptor protein to be  
364 delivered to another VgrG, called VgrG1 [16,17], showing that a sole toxin can be targeted  
365 directly and indirectly to two different VgrG proteins. Tap-1 (Tec) belongs to the DUF4123  
366 family of adaptor proteins that contains also VasW of *V. cholerae* [18] and several  
367 uncharacterized gene products linked to effector genes with a MIX (marker for type VI  
368 effectors) motif in *Proteus mirabilis* or *B. thailandensis* for instance [19]. Interestingly TecT,  
369 a DUF4123 adaptor of *P. aeruginosa*, has been shown to require a co-adaptor, called co-TecT,  
370 to deliver the TseT effector to the PAAR4 protein [27]. This is the first example of an  
371 adaptor-co-adaptor module. Taken together these data suggest a conserved role for DUF4123  
372 adaptors in the recruitment of a number of T6SS effectors. Remarkably Tla3 of *P. aeruginosa*  
373 does not belong to the DUF4123 adaptor family, or to that of the two other unrelated families,  
374 the DUF1795 adaptor family, reported with EagR (effector-associated gene with Rhs) in  
375 *Serratia marcescens* [21] or EagT6 in *P. aeruginosa* [20], and the DUF2169 adaptor family  
376 reported with Atu3641 in *A. tumefaciens* [22]. Nor Tla3 is a PAAR protein, the last class of  
377 effector targeting mode to a VgrG [22,27,36–38]. Instead we find that Tla3 harbors two  
378 DUF2875 domains (Fig. 3A) that are both required for the interaction with the toxin.  
379 Moreover genes coding DUF2875 containing proteins can be find at the vicinity of *tle*, *tli*,  
380 *vgrG* or PAAR genes, but they are restricted to  $\alpha$  and  $\beta$  proteobacteria (Fig. Sup 5). We thus  
381 hypothesize that DUF2875 might assist in T6SS-mediated effector delivery. Like the three  
382 other adaptor families (DUF4123, DUF1795, DUF2169), we have observed that Tla3 is not  
383 required for the H2-T6SS functionality since the  $\Delta tla3$  mutant still secrete Hcp2b and can  
384 compete with a WT strain, and that Tla3 is specific for the Tle3 toxin since it did not interact  
385 with another H2-T6SS effector, TplE (Tle4). Finally as we did not detect Tla3 secretion under

386 constitutive H2-T6SS condition, we propose that Tla3 hands over Tle3 to VgrG2b in the  
387 cytoplasm prior to its loading to the baseplate and further recruitment to the central Hcp tube  
388 in preparation (Fig. 8). Overall, the existence of various modes of effector recruitment, further  
389 refined with adaptors, likely explains how the T6SS is able to deliver numerous and  
390 structurally diverse proteins.

391 Five families of Tle, Tle1-5, have been identified among Gram-negative bacteria [11]  
392 and four Tle have been studied in *P. aeruginosa* so far. Our demonstration of the activity of  
393 Tle3 in the periplasm is consistent with the observations that the heterologous periplasmic  
394 production of PldA (Tle5a) [11,12], PldB (Tle5b) [12], Tle1 [39] and TplE (Tle4) [13] is  
395 toxic. The reason of the periplasmic activity of Tle proteins is still unclear although several  
396 hypothesis have been proposed [29], the most likely being an activation of the toxin in this  
397 compartment. Very recently this has nicely been exemplified with the hijacking of DsbA in  
398 the target cells of *Serratia macescens* for the activation of incoming effectors [40]. No  
399 member of the Tle3 family has yet been enzymatically characterized. Our attempts to  
400 efficiently purify Tle3 from *E. coli* or from *P. aeruginosa* have been unsuccessful, even if we  
401 have noticed that the presence of the Tla3 adaptor stabilized Tle3, it still formed inclusion  
402 bodies. In the future we will decipher the enzymatic activity of Tle3, which is presumably  
403 active on membrane phospholipids as our preliminary data of thin-layer chromatography tend  
404 to show.

405 The periplasmic activity of Tle toxins is counteracted by the synthesis of a cognate  
406 immunity protein that is usually a periplasmic soluble protein, as we showed for Tli3 in *P.*  
407 *aeruginosa*, or a membrane-anchored lipoprotein [11]. Interestingly the genetic organization  
408 of the *tli3* gene upstream of the *tle3* gene observed in *E. coli*, *K. pneumoniae*, *B. cenocepacia*  
409 or *R. solanacearum* [11] is conserved in *P. aeruginosa*. The fact that the two genes are co-  
410 transcribed (the immunity being the first) is key for the protection against toxicity. Indeed we



411 have observed systematic protection against the periplasmic toxicity of Tle3 in *E. coli* when  
412 the two genes were expressed from the same promoter under the same plasmid whereas it was  
413 not as efficient when the genes were on two plasmids. This genetic link reinforces the  
414 connection within the toxin/immunity pair. This has previously been noticed with a T7SS  
415 antibacterial toxin and its immunity in *Staphylococcus aureus* [41]. Other immunities of Tle  
416 characterized so far have been shown to inhibit the action of the effector by direct protein-  
417 protein contacts [11,12,29]. Our copurification assay in *E. coli* demonstrates a direct  
418 interaction between Tle3 and Tli3 that was already suggested with the release of Tle3 toxicity  
419 upon coproduction of Tli3 in the periplasm. A crystal structure of the *P. aeruginosa* TplE  
420 (Tle4) effector in complex with its immunity protein TplEI (Tli4) revealed that the immunity  
421 uses a grasp mechanism to prevent the interfacial activation of the toxin [30].

422         Like two other H2-T6SS related orphan *vgrG* loci, the *vgrG4b* cluster encoding PldA  
423 (Tle5a) and the *vgrG2a* encoding TplE (Tle4), we show here that the *vgrG2b* cluster has both  
424 antibacterial activities (through Tle3 and VgrG2b) and anti-eukaryotic (through VgrG2b;  
425 [26]). Interestingly VgrG2b is thus (i) a structural component of the H2-T6SS puncturing  
426 device since our bacterial competition showed its requirement for Tle3 delivery, (ii) an anti-  
427 eukaryotic effector through an interaction with the microtubule nucleating complex [26] and  
428 (iii) an antibacterial effector as suggested by our toxicity assay in *E. coli*. We have shown that  
429 two conserved residues of the putative metallopeptidase motif (an histidine and a glutamic  
430 acid) are essential for the VgrG2b antibacterial activity. This is consistent with an  
431 antibacterial protease activity for VgrG2b that will be, to our knowledge, the first case in the  
432 T6SS effector literature. The discovery of the VgrG2b immunity is even more exciting. Could  
433 it share Tli3 with Tle3? We also hypothesize that an auto-immunity mechanism could exist in  
434 which an immunity domain within VgrG2b could be released upon auto-processing liberating  
435 the active protease domain like the Serine protease autotransporter proteins.

436

## 437 **Materials and Methods**

### 438 **Bacterial strains, growth conditions and plasmid construction**

439 All *P. aeruginosa* and *E. coli* strains used in this study are described in  
440 Supplementary Table 1. Briefly, the *E. coli* K-12 DH5 $\alpha$  and CC118 $\lambda$ Pir were used for  
441 cloning procedures. The BL21(DE3)pLysS and BTH101 were used for protein production  
442 and BACTH analyses respectively. Strains were grown in LB or in TSB medium (for *P.*  
443 *aeruginosa*) at 37°C or 30°C. Specific growth conditions are specified in the text when  
444 necessary. Recombinant plasmids were introduced into *P. aeruginosa* by triparental mating  
445 using the conjugative properties of the helper plasmid pRK2013 (Supplementary Table 1).  
446 Plasmids were maintained by the addition of ampicillin (50  $\mu$ g/mL), kanamycin (50  $\mu$ g/mL),  
447 chloramphenicol (30  $\mu$ g/mL), streptomycin (30  $\mu$ g/mL for *E. coli*, 2000  $\mu$ g/mL for *P.*  
448 *aeruginosa*) or gentamicin (30  $\mu$ g/mL for *E. coli*, 115  $\mu$ g/mL for *P. aeruginosa*). Expression  
449 of genes from pT7 in BL21(DE3)pLysS was blocked with 0.4% of glucose and induced in  
450 exponential phase (OD<sub>600</sub>= 0.4-0.6) for 3 hours with 1mM of IPTG. Cloning procedures were  
451 described in [26]. The plasmids used and constructed are described in Supplementary Table 1,  
452 the list of oligonucleotides (synthesized by Eurogentec or IDT) is given in Supplementary  
453 Table 2.

454

### 455 **Cloning procedures for *P. aeruginosa* mutants**

456 To generate *P. aeruginosa* mutants, 500 bp upstream and 500 bp downstream of the  
457 gene to be deleted were amplified by overlapping PCR with Q5 high fidelity DNA  
458 polymerase (NEB) using primers listed in Supplementary Table 1. The PCR product was  
459 cloned in pKNG101 suicide vector by one-step sequence and ligation-independent cloning  
460 (SLIC) [42], which was then sequenced. pKNG101 derivatives, maintained in the *E. coli*

461 CC118 $\lambda$ pir strain, were mobilized in *P. aeruginosa* strains. The mutants, in which the double  
462 recombination events occurred, were confirmed by PCR analysis.

463

#### 464 **Heterologous toxicity assays**

465 *E. coli* BL21(DE3)pLysS containing plasmids producing cytoplasmic or periplasmic  
466 targeted proteins were grown overnight at 37°C in LB with 0.4% of glucose. 10  $\mu$ L drops of  
467 bacterial suspensions serially diluted were spotted onto LB agar plates containing 0.1 mM  
468 IPTG or 0.4 % glucose and cells were grown for 16 h at 37°C.

469

#### 470 **Bacterial two-Hybrid Assay**

471 Protein-protein interactions were assessed with the adenylate cyclase-based two-  
472 hybrid technique using protocols published previously [43,44]. Briefly, the proteins to be  
473 tested were fused to the isolated T18 and T25 catalytic domains of the *Bordetella* adenylate  
474 cyclase. After introduction of the two plasmids producing the fusion proteins into the reporter  
475 BTH101 strain, plates were incubated at 30°C for 24 h. Three independent colonies for each  
476 transformation were inoculated into 600  $\mu$ l of LB medium supplemented with ampicillin (50  
477  $\mu$ g/mL), kanamycin (50  $\mu$ g/mL), and IPTG (0.5 mM). After overnight growth at 30 °C, 5  $\mu$ l  
478 of each culture was spotted onto LB agar plates supplemented with ampicillin, kanamycin,  
479 IPTG, and 5-bromo-4-chloro-3-indonyl-D-galactopyrannoside (X-gal, 40 $\mu$ g/mL) and  
480 incubated for 16 h at 30 °C.

481

#### 482 **Protein purification by affinity chromatography**

483 *Escherichia coli* BL21(DE3)pLysS cells carrying the pRSFDUET-1 and pETDUET-1  
484 derivatives were grown at 37°C in LB to an OD<sub>600</sub> ~ 0.5 and the expression of the PA0262,  
485 PA0261, PA0260 or PA0259 genes was induced with IPTG (1 mM) for 3 h at 37°C. Cells

486 were harvested by centrifugation at  $1914 \times g$  for 30 min at  $4^{\circ}\text{C}$ . The cell pellet was  
487 resuspended in Tris-HCl 50 mM pH 8.0, NaCl 150 mM, Triton X-100 0.1%, lysozyme 0.5  
488 mg/mL and EDTA 1 mM and stored at  $-80^{\circ}\text{C}$ . Cells were supplemented with DNase (20  
489  $\mu\text{g}/\text{mL}$ ),  $\text{MgCl}_2$  and phenylmethylsulfonyl fluoride 1mM and cells were lysed by three  
490 passages at the Emulsiflex-C5 (Avestin), and lysates were clarified by centrifugation at  $16000$   
491  $\times g$  for 30 min. The supernatant was loaded onto a 5-mL StrepTrap HP (GE Healthcare)  
492 column and then washed with 50 mM Tris-HCl pH 8.0, 150 mM NaCl at  $4^{\circ}\text{C}$ . The fusion  
493 protein was eluted in the affinity buffer supplemented with 2.5 mM desthiobiotin. Peak  
494 fractions were pooled and loaded onto a Superose 200 10/300 column (GE Healthcare)  
495 equilibrated in 50 mM Tris-HCl pH 8.0, 50 mM NaCl.

496

#### 497 **Fractionation of *P. aeruginosa***

498 Fractionation of cells into spheroplasts (cytoplasm and membranes) and periplasmic  
499 fractions were done as previously described [45]. Proteins corresponding to the cytoplasm and  
500 periplasm fractions or to insoluble material were resuspended in loading buffer.

501

#### 502 **Protein secretion**

503 *P. aeruginosa* strains were grown at  $25^{\circ}\text{C}$  in TBS for 24 hours. Cells corresponding to  
504 10 units  $\text{DO}_{600}$  and extracellular medium were separated by centrifugation at  $2000 \times g$  for 10  
505 min at room temperature. 2/3 of the supernatants were collected and centrifuged at  $13\ 000 \times g$   
506 for 5 min at room temperature. Proteins contained in the supernatant were precipitated with  
507 trichloro-acetic acid (TCA, 15%) for 3 h at  $4^{\circ}\text{C}$ . Samples were centrifuged at  $13\ 000 \times g$  for  
508 30 min at  $4^{\circ}\text{C}$ , pellets washed with 90% acetone and resuspended in loading buffer.

509

#### 510 **SDS-PAGE and western-blot**

511 Protein samples derived from equivalent amounts of culture (i.e. optical density  
512 equivalents) resuspended in loading buffer were boiled and separated by SDS-PAGE.  
513 Proteins were then stained by Coomassie-blue or immunodetected as described before [26]  
514 using primary polyclonal antibodies directed against His6 epitope-tag (Penta His, Qiagen,  
515 dilution 1:1000), V5 epitope-tag (Bethyl Laboratories, dilution 1:1000), Strep epitope-tag  
516 (IBA StrepMAB Classic, dilution 1:000), DsbA (kindly gifted by K.E. Jaeger – university of  
517 Heinrich-Heine, dilution 1:25000), or monoclonal antibodies directed against EF-Tu (Hycult-  
518 biotech, dilution 1:20000), XcpY (laboratory collection, dilution 1:5000), TolB (laboratory  
519 collection, dilution 1/500). Peroxidase-conjugated anti-Mouse or anti-Rabbit IgGs (Sigma,  
520 dilution 1:5000) were used as secondary antibodies. Nitrocellulose membranes were revealed  
521 with homemade enhanced chemiluminescence and were scanned using ImageQuant LAS4000  
522 analysis software (GE Healthcare Life sciences).

523 Protein samples equivalent to 0.1 OD<sub>600</sub> units were loaded for whole cell and  
524 spheroplasts analysis while protein samples equivalent to 0.2 OD<sub>600</sub> units were used for  
525 cytoplasm or periplasm analysis and protein samples equivalent to 1 OD<sub>600</sub> units were used  
526 for extracellular medium analysis.

527

## 528 **Bacterial Competition assays**

529 Intraspecific competition assays between *P. aeruginosa* strains were performed as  
530 previously described [12] with modifications. The prey cells carry pJN105 vector (Gm<sup>R</sup>) to  
531 allow counterselection. Overnight cultures of *P. aeruginosa* attacker and prey cells were  
532 mixed in a 5 : 1 (attacker : prey) ratio and harvested by centrifugation at 3724 x g for 5 min.  
533 The pellet was resuspended in 200 µL of PBS 1X and spotted onto 0.45-µm nitrocellulose  
534 membranes overlaid on a 1 % bactoagar plate. After 24 hours of incubation at 37°C, cells  
535 were resuspended in 2 mL of PBS 1X, normalized to an OD<sub>600nm</sub> of 0.5 and 10 µL of bacterial

536 serially diluted ( $10^{-1}$  to  $10^{-6}$ ) were spotted onto selective LB agar plates containing gentamicin  
537 (125  $\mu\text{g}/\text{mL}$ ). Significant growth difference of the prey bacteria for each competition assay  
538 was computed by one-way ANOVA (Stat Plus) and unpaired Student's Test (Excel).

539

#### 540 **Acknowledgments**

541 We thank V. Tutagata for pVT1, pVT8 and pVT9 constructs, B. Douzy for all the  
542 advices during protein purification and members of B.B. PhD committee for helpful  
543 discussion and support. We are grateful to M. Ba, I. Bringer, A. Brun and O. Uderso for  
544 technical assistance. B.B. was financed with a PhD fellowship from the French Research  
545 Ministry. This work was supported by recurrent funding from the CNRS and Aix-Marseille  
546 University. The project leading to this publication has received funding from the Excellence  
547 Initiative of Aix-Marseille University-A\*Midex, a French "Investissements d'Avenir"  
548 program ("Emergence & Innovation" A-M-AAP-EI-17-139-170301-10.31-BLEVES-HLS).

549

#### 550 **Author contributions**

551 B.B. and S.B. designed and conceived the experiments. B.B., C.S., and S.D. performed  
552 the experiments. S.B. supervised the execution of the experiments. B.B., C.S., B.I. and S.B.  
553 analyzed and discussed the data. S.B. wrote the paper with contribution from B.B. and  
554 reading from B.I.

555

#### 556 **References**

- 557 [1] WHO publishes list of bacteria for which new antibiotics are urgently needed, (n.d.).  
558 [https://www.who.int/news-room/detail/27-02-2017-who-publishes-list-of-bacteria-for-which-](https://www.who.int/news-room/detail/27-02-2017-who-publishes-list-of-bacteria-for-which-new-antibiotics-are-urgently-needed)  
559 [new-antibiotics-are-urgently-needed](https://www.who.int/news-room/detail/27-02-2017-who-publishes-list-of-bacteria-for-which-new-antibiotics-are-urgently-needed) (accessed January 21, 2019).
- 560 [2] S. Bleves, V. Viarre, R. Salacha, G.P.F. Michel, A. Filloux, R. Voulhoux, Protein  
561 secretion systems in *Pseudomonas aeruginosa*: A wealth of pathogenic weapons, *Int. J. Med.*  
562 *Microbiol.* 300 (2010) 534–543. doi:10.1016/j.ijmm.2010.08.005.
- 563 [3] J.D. Mougous, M.E. Cuff, S. Raunser, A. Shen, M. Zhou, C.A. Gifford, A.L.  
564 Goodman, G. Joachimiak, C.L. Ordoñez, S. Lory, T. Walz, A. Joachimiak, J.J. Mekalanos, A

- 565 virulence locus of *Pseudomonas aeruginosa* encodes a protein secretion apparatus, *Science*.  
566 312 (2006) 1526–1530. doi:10.1126/science.1128393.
- 567 [4] S. Pukatzki, A.T. Ma, D. Sturtevant, B. Krastins, D. Sarracino, W.C. Nelson, J.F.  
568 Heidelberg, J.J. Mekalanos, Identification of a conserved bacterial protein secretion system in  
569 *Vibrio cholerae* using the *Dictyostelium* host model system, *Proc. Natl. Acad. Sci. U.S.A.* 103  
570 (2006) 1528–1533. doi:10.1073/pnas.0510322103.
- 571 [5] R.D. Hood, P. Singh, F. Hsu, T. Güvener, M.A. Carl, R.R.S. Trinidad, J.M. Silverman,  
572 B.B. Ohlson, K.G. Hicks, R.L. Plemel, M. Li, S. Schwarz, W.Y. Wang, A.J. Merz, D.R.  
573 Goodlett, J.D. Mougous, A type VI secretion system of *Pseudomonas aeruginosa* targets a  
574 toxin to bacteria, *Cell Host Microbe*. 7 (2010) 25–37. doi:10.1016/j.chom.2009.12.007.
- 575 [6] F.R. Cianfanelli, L. Monlezun, S.J. Coulthurst, Aim, Load, Fire: The Type VI  
576 Secretion System, a Bacterial Nanoweapon, *Trends Microbiol.* 24 (2016) 51–62.  
577 doi:10.1016/j.tim.2015.10.005.
- 578 [7] T.G. Sana, N. Flaugnatti, K.A. Lugo, L.H. Lam, A. Jacobson, V. Baylot, E. Durand, L.  
579 Journet, E. Cascales, D.M. Monack, *Salmonella Typhimurium* utilizes a T6SS-mediated  
580 antibacterial weapon to establish in the host gut, *Proc. Natl. Acad. Sci. U.S.A.* 113 (2016)  
581 E5044-5051. doi:10.1073/pnas.1608858113.
- 582 [8] A.L. Hecht, B.W. Casterline, Z.M. Earley, Y.A. Goo, D.R. Goodlett, J. Bubeck  
583 Wardenburg, Strain competition restricts colonization of an enteric pathogen and prevents  
584 colitis, *EMBO Rep.* 17 (2016) 1281–1291. doi:10.15252/embr.201642282.
- 585 [9] D.L. MacIntyre, S.T. Miyata, M. Kitaoka, S. Pukatzki, The *Vibrio cholerae* type VI  
586 secretion system displays antimicrobial properties, *Proc. Natl. Acad. Sci. U.S.A.* 107 (2010)  
587 19520–19524. doi:10.1073/pnas.1012931107.
- 588 [10] T.G. Sana, A. Hachani, I. Bucior, C. Soccia, S. Garvis, E. Termine, J. Engel, A.  
589 Filloux, S. Bleves, The second type VI secretion system of *Pseudomonas aeruginosa* strain  
590 PAO1 is regulated by quorum sensing and Fur and modulates internalization in epithelial cells,  
591 *J. Biol. Chem.* 287 (2012) 27095–27105. doi:10.1074/jbc.M112.376368.
- 592 [11] A.B. Russell, M. LeRoux, K. Hathazi, D.M. Agnello, T. Ishikawa, P.A. Wiggins, S.N.  
593 Wai, J.D. Mougous, Diverse type VI secretion phospholipases are functionally plastic  
594 antibacterial effectors, *Nature*. 496 (2013) 508–512. doi:10.1038/nature12074.
- 595 [12] F. Jiang, N.R. Waterfield, J. Yang, G. Yang, Q. Jin, A *Pseudomonas aeruginosa* type  
596 VI secretion phospholipase D effector targets both prokaryotic and eukaryotic cells, *Cell Host*  
597 *Microbe*. 15 (2014) 600–610. doi:10.1016/j.chom.2014.04.010.
- 598 [13] F. Jiang, X. Wang, B. Wang, L. Chen, Z. Zhao, N.R. Waterfield, G. Yang, Q. Jin, The  
599 *Pseudomonas aeruginosa* Type VI Secretion PGAP1-like Effector Induces Host Autophagy  
600 by Activating Endoplasmic Reticulum Stress, *Cell Rep.* 16 (2016) 1502–1509.  
601 doi:10.1016/j.celrep.2016.07.012.
- 602 [14] S. Bleves, Game of Trans-Kingdom Effectors, *Trends Microbiol.* 24 (2016) 773–774.  
603 doi:10.1016/j.tim.2016.08.002.
- 604 [15] M. Basler, Type VI secretion system: secretion by a contractile nanomachine, *Philos.*  
605 *Trans. R. Soc. Lond., B, Biol. Sci.* 370 (2015). doi:10.1098/rstb.2015.0021.
- 606 [16] X. Liang, R. Moore, M. Wilton, M.J.Q. Wong, L. Lam, T.G. Dong, Identification of  
607 divergent type VI secretion effectors using a conserved chaperone domain, *Proc. Natl. Acad.*  
608 *Sci. U.S.A.* 112 (2015) 9106–9111. doi:10.1073/pnas.1505317112.
- 609 [17] D. Unterweger, B. Kostiuik, R. Ötjengerdes, A. Wilton, L. Diaz-Satizabal, S. Pukatzki,  
610 Chimeric adaptor proteins translocate diverse type VI secretion system effectors in *Vibrio*  
611 *cholerae*, *EMBO J.* 34 (2015) 2198–2210. doi:10.15252/embj.201591163.
- 612 [18] S.T. Miyata, D. Unterweger, S.P. Rudko, S. Pukatzki, Dual expression profile of type  
613 VI secretion system immunity genes protects pandemic *Vibrio cholerae*, *PLoS Pathog.* 9  
614 (2013) e1003752. doi:10.1371/journal.ppat.1003752.

- 615 [19] D. Salomon, L.N. Kinch, D.C. Trudgian, X. Guo, J.A. Klimko, N.V. Grishin, H.  
616 Mirzaei, K. Orth, Marker for type VI secretion system effectors, *Proc. Natl. Acad. Sci. U.S.A.*  
617 111 (2014) 9271–9276. doi:10.1073/pnas.1406110111.
- 618 [20] J.C. Whitney, D. Quentin, S. Sawai, M. LeRoux, B.N. Harding, H.E. Ledvina, B.Q.  
619 Tran, H. Robinson, Y.A. Goo, D.R. Goodlett, S. Raunser, J.D. Mougous, An interbacterial  
620 NAD(P)(+) glycohydrolase toxin requires elongation factor Tu for delivery to target cells,  
621 *Cell*. 163 (2015) 607–619. doi:10.1016/j.cell.2015.09.027.
- 622 [21] J. Alcoforado Diniz, S.J. Coulthurst, Intraspecies Competition in *Serratia marcescens*  
623 Is Mediated by Type VI-Secreted Rhs Effectors and a Conserved Effector-Associated  
624 Accessory Protein, *J. Bacteriol.* 197 (2015) 2350–2360. doi:10.1128/JB.00199-15.
- 625 [22] D.D. Bondage, J.-S. Lin, L.-S. Ma, C.-H. Kuo, E.-M. Lai, VgrG C terminus confers  
626 the type VI effector transport specificity and is required for binding with PAAR and adaptor-  
627 effector complex, *Proc. Natl. Acad. Sci. U.S.A.* 113 (2016) E3931-3940.  
628 doi:10.1073/pnas.1600428113.
- 629 [23] J. Benz, A. Meinhart, Antibacterial effector/immunity systems: it’s just the tip of the  
630 iceberg, *Curr. Opin. Microbiol.* 17 (2014) 1–10. doi:10.1016/j.mib.2013.11.002.
- 631 [24] T.G. Sana, B. Berni, S. Bleves, The T6SSs of *Pseudomonas aeruginosa* Strain PAO1  
632 and Their Effectors: Beyond Bacterial-Cell Targeting, *Front Cell Infect Microbiol.* 6 (2016)  
633 61. doi:10.3389/fcimb.2016.00061.
- 634 [25] K.D. LaCourse, S.B. Peterson, H.D. Kulasekara, M.C. Radey, J. Kim, J.D. Mougous,  
635 Conditional toxicity and synergy drive diversity among antibacterial effectors, *Nat Microbiol.*  
636 3 (2018) 440–446. doi:10.1038/s41564-018-0113-y.
- 637 [26] T.G. Sana, C. Baumann, A. Merdes, C. Soscia, T. Rattei, A. Hachani, C. Jones, K.L.  
638 Bennett, A. Filloux, G. Superti-Furga, R. Voulhoux, S. Bleves, Internalization of  
639 *Pseudomonas aeruginosa* Strain PAO1 into Epithelial Cells Is Promoted by Interaction of a  
640 T6SS Effector with the Microtubule Network, *MBio.* 6 (2015) e00712.  
641 doi:10.1128/mBio.00712-15.
- 642 [27] B.J. Burkinshaw, X. Liang, M. Wong, A.N.H. Le, L. Lam, T.G. Dong, A type VI  
643 secretion system effector delivery mechanism dependent on PAAR and a chaperone-co-  
644 chaperone complex, *Nat Microbiol.* 3 (2018) 632–640. doi:10.1038/s41564-018-0144-4.
- 645 [28] J.M. Kollman, A. Merdes, L. Mourey, D.A. Agard, Microtubule nucleation by  $\gamma$ -  
646 tubulin complexes, *Nat. Rev. Mol. Cell Biol.* 12 (2011) 709–721. doi:10.1038/nrm3209.
- 647 [29] N. Flaugnatti, T.T.H. Le, S. Canaan, M.-S. Aschtgen, V.S. Nguyen, S. Blangy, C.  
648 Kellenberger, A. Roussel, C. Cambillau, E. Cascales, L. Journet, A phospholipase A1  
649 antibacterial Type VI secretion effector interacts directly with the C-terminal domain of the  
650 VgrG spike protein for delivery, *Mol. Microbiol.* 99 (2016) 1099–1118.  
651 doi:10.1111/mmi.13292.
- 652 [30] D. Lu, Y. Zheng, N. Liao, L. Wei, B. Xu, X. Liu, J. Liu, The structural basis of the  
653 Tle4-Tli4 complex reveals the self-protection mechanism of H2-T6SS in *Pseudomonas*  
654 *aeruginosa*, *Acta Crystallogr. D Biol. Crystallogr.* 70 (2014) 3233–3243.  
655 doi:10.1107/S1399004714023967.
- 656 [31] H. Nielsen, Predicting Secretory Proteins with SignalP, in: D. Kihara (Ed.), *Protein*  
657 *Function Prediction*, Springer New York, New York, NY, 2017: pp. 59–73. doi:10.1007/978-  
658 1-4939-7015-5\_6.
- 659 [32] A.S. Kolaskar, B.V. Reddy, A method to locate protein coding sequences in DNA of  
660 prokaryotic systems, *Nucleic Acids Res.* 13 (1985) 185–194.
- 661 [33] L.P. Allsopp, T.E. Wood, S.A. Howard, F. Maggiorcelli, L.M. Nolan, S. Wettstadt, A.  
662 Filloux, RsmA and AmrZ orchestrate the assembly of all three type VI secretion systems in  
663 *Pseudomonas aeruginosa*, *Proc. Natl. Acad. Sci. U.S.A.* 114 (2017) 7707–7712.  
664 doi:10.1073/pnas.1700286114.



- 665 [34] S. Pukatzki, A.T. Ma, A.T. Revel, D. Sturtevant, J.J. Mekalanos, Type VI secretion  
666 system translocates a phage tail spike-like protein into target cells where it cross-links actin,  
667 *Proc. Natl. Acad. Sci. U.S.A.* 104 (2007) 15508–15513. doi:10.1073/pnas.0706532104.
- 668 [35] T.G. Dong, B.T. Ho, D.R. Yoder-Himes, J.J. Mekalanos, Identification of T6SS-  
669 dependent effector and immunity proteins by Tn-seq in *Vibrio cholerae*, *Proc. Natl. Acad. Sci.*  
670 *U.S.A.* 110 (2013) 2623–2628. doi:10.1073/pnas.1222783110.
- 671 [36] M.M. Shneider, S.A. Buth, B.T. Ho, M. Basler, J.J. Mekalanos, P.G. Leiman, PAAR-  
672 repeat proteins sharpen and diversify the type VI secretion system spike, *Nature*. 500 (2013)  
673 350–353. doi:10.1038/nature12453.
- 674 [37] J.C. Whitney, C.M. Beck, Y.A. Goo, A.B. Russell, B.N. Harding, J.A. De Leon, D.A.  
675 Cunningham, B.Q. Tran, D.A. Low, D.R. Goodlett, C.S. Hayes, J.D. Mougous, Genetically  
676 distinct pathways guide effector export through the type VI secretion system, *Mol. Microbiol.*  
677 92 (2014) 529–542. doi:10.1111/mmi.12571.
- 678 [38] F.R. Cianfanelli, J. Alcoforado Diniz, M. Guo, V. De Cesare, M. Trost, S.J. Coulthurst,  
679 VgrG and PAAR Proteins Define Distinct Versions of a Functional Type VI Secretion System,  
680 *PLoS Pathog.* 12 (2016) e1005735. doi:10.1371/journal.ppat.1005735.
- 681 [39] H. Hu, H. Zhang, Z. Gao, D. Wang, G. Liu, J. Xu, K. Lan, Y. Dong, Structure of the  
682 type VI secretion phospholipase effector Tle1 provides insight into its hydrolysis and  
683 membrane targeting, *Acta Crystallogr. D Biol. Crystallogr.* 70 (2014) 2175–2185.  
684 doi:10.1107/S1399004714012899.
- 685 [40] G. Mariano, L. Monlezun, S.J. Coulthurst, Dual Role for DsbA in Attacking and  
686 Targeted Bacterial Cells during Type VI Secretion System-Mediated Competition, *Cell Rep.*  
687 22 (2018) 774–785. doi:10.1016/j.celrep.2017.12.075.
- 688 [41] Z. Cao, M.G. Casabona, H. Kneuper, J.D. Chalmers, T. Palmer, The type VII secretion  
689 system of *Staphylococcus aureus* secretes a nuclease toxin that targets competitor bacteria,  
690 *Nat Microbiol.* 2 (2016) 16183. doi:10.1038/nmicrobiol.2016.183.
- 691 [42] J.-Y. Jeong, H.-S. Yim, J.-Y. Ryu, H.S. Lee, J.-H. Lee, D.-S. Seen, S.G. Kang, One-  
692 step sequence- and ligation-independent cloning as a rapid and versatile cloning method for  
693 functional genomics studies, *Appl. Environ. Microbiol.* 78 (2012) 5440–5443.  
694 doi:10.1128/AEM.00844-12.
- 695 [43] G. Karimova, J. Pidoux, A. Ullmann, D. Ladant, A bacterial two-hybrid system based  
696 on a reconstituted signal transduction pathway, *Proc. Natl. Acad. Sci. U.S.A.* 95 (1998) 5752–  
697 5756.
- 698 [44] A. Battesti, E. Bouveret, The bacterial two-hybrid system based on adenylate cyclase  
699 reconstitution in *Escherichia coli*, *Methods*. 58 (2012) 325–334.  
700 doi:10.1016/j.ymeth.2012.07.018.
- 701 [45] B. Ize, V. Viarre, R. Voulhoux, Cell fractionation, *Methods Mol. Biol.* 1149 (2014)  
702 185–191. doi:10.1007/978-1-4939-0473-0\_15.

703

704

705

706 **Figure legends**

707 **Fig. 1: *vgrG2b* island organization (A)** The genes are labeled with the given name (i.e.,  
708 *hcp2b*) and are indicated by their annotation number (e.g., PA0263). The Sec signal peptide of  
709 Tli3 (PA0261) and the two DU2875 of Tla3 (PA0259) are represented with striped boxes.  
710 **The Tle3 periplasmic toxicity is counteracted by Tli3 (PA0261) (B).** Serial dilutions (from  
711 non-diluted to  $10^{-7}$ ) of normalized cultures of *E. coli* BL21(DE3)pLysS producing the wild-  
712 type Tle3 in the cytoplasm, called Tle3<sup>c</sup> (from pVT1, a pETDuet-1 derivate) or in the  
713 periplasm, called Tle3<sup>p</sup> (from pSBC81, a pET22b(+) derivate yielding a fusion of Tle3 with a  
714 Sec signal peptide) were spotted on LB agar plates supplemented (left panel) with 0.4%  
715 glucose or (right panel) with 0.1mM IPTG. Glucose and IPTG allow respectively repression  
716 and induction of the gene encoding the T7 RNA polymerase. When indicated Tli1 (PA0261)  
717 or Tla3 (PA0259) were produced in the periplasm from pVT8, pVT9 and pSBC107  
718 respectively, pRSFDuet-1 derivatives. Line 1: pET22b(+) and pRSFDuet-1, line 2: pVT1 and  
719 pRSFDuet-1, line 3: pSBC81 and pRSFDuet-1, line 4: pSBC81 and pVT8, line 5: pSBC81  
720 and pVT9, line 6: pVT8 and pET22b(+), line 7: pVT9 and pET22b(+) line 8: pSBC107 is a  
721 pRSFDuet-1 derivate producing Tli3 (PA0261) and Tle3<sup>p</sup> from the same transcript.

722

723 **Fig. 2 : Tli3 (PA0261) interacts with Tle3 (A)** Copurification assay on StrepTactin column  
724 of Tli3cSTREP with Tle3c10HIS produced in *E. coli* BL21(DE3)pLysS produced from  
725 pBB26 and pVT1 respectively. The unbound (U) and eluted (E) fractions were collected and  
726 subjected to SDS-PAGE (10.5 %) and Western blot analyses using anti-His antibody (Upper)  
727 and anti-streptavidin antibody (Lower). The position of the proteins and the molecular mass  
728 markers (in kDa) are indicated. **Tli3 (PA0261) is a periplasmic protein in *P. aeruginosa* (B)**  
729 Cells of *P. aeruginosa* PAO1 tli3V5 were subjected to fractionation and immunoblotting  
730 using antibodies directed against the V5 tag, XcpY and DsbA. XcpY and DsbA were used as

731 membrane and periplasmic controls respectively. T: whole cell, C: cytoplasm, Mb: total  
732 membrane, P: periplasm. The position of the proteins and the molecular mass markers (in kDa)  
733 are indicated.

734

735 **Fig. 3: Tla3 (PA0259) interacts with the Tle3 toxin and with VgrG2b. Domain**

736 **organization of VgrG2b, Tle3 and Tla3 (PA0259) (A).** The first 581 residues of VgrG2b

737 carry the VgrG domain homologous to gp27 and gp5 phage tail proteins and consisting of

738 three sub-domains. This is followed by the C-terminal extension, composed of a conserved

739 domain of uncharacterized proteins (DUF2345, PF10106) (domain 1), a TTR (transthyretin-

740 like region) (domain 2), and a putative zinc-dependent metallopeptidase pattern

741 (LFIHEMTHVW signature, PS00142 (in domain 3). Tle3 architecture consists of an  $\alpha$   $\beta$

742 hydrolase fold domain followed by a DUF3274, Tla3 of a tandem of DUF2875. **Bacterial**

743 **two-hybrid assay (B, C and D).** BTH101 reporter cells producing the indicated proteins or

744 domains fused to the T18 or T25 domain of the *Bordetella* adenylate cyclase were spotted on

745 X-gal indicator plates. The blue color of the colony reflects the interaction between the two

746 proteins. TolB and Pal are two proteins known to interact but unrelated to the T6SS. The

747 experiment was performed in triplicate and a representative result is shown.

748

749 **Fig. 4: Tla3 interaction with Tle3 (A) and VgrG2b (B-D)** Copurification assay on

750 StrepTactin column of Tla3<sup>c</sup><sub>STREP</sub> with Tle3<sup>c</sup><sub>His</sub> produced *in E. coli* BL21(DE3)pLysS from

751 pBB27 and pVT1 respectively (A) or of Tla3<sup>c</sup><sub>His</sub> with VgrG2b<sup>FL</sup><sub>STREP</sub> (B) or VgrG2b<sup>FLD3</sup><sub>STREP</sub>

752 (C) or VgrG2b<sup>FLD2-3</sup><sub>STREP</sub> (D) produced from pBB28 and pBB25 (B) or pBB41(C) or pBB42

753 (D). The unbound (U) and eluted (E) fractions were collected and subjected to SDS-PAGE

754 (10.5%) and Western blot analysis using anti-His antibody (Upper) and anti-streptavidin

755 antibody (Lower). The dashed line separates lanes from non-adjacent part of the same gel.  
756 The position of the proteins and the molecular mass markers (in kDa) are indicated.

757

758 **Fig. 5: Tla3(PA0259) is a cytoplasmic protein of *P. aeruginosa*** (A) Cells of *P. aeruginosa*

759 PAO1 *tla3*<sub>V5</sub> were subjected to fractionation and immunoblotting using antibodies directed

760 against the V5 tag, XcpY and DsbA. XcpY and DsbA were used as membrane and

761 periplasmic controls respectively. T: whole cell, C: cytoplasm, Mb: total membrane, P:

762 periplasm. **The annotated ATG drives the initiation of translation of *tla3* in *P. aeruginosa***

763 (B). Immunodetection of Tla3<sub>V5</sub> with anti-V5 antibodies produced in a WT background or in

764 strains in which one of the four predicted ATG in *tla3* have been substituted in ATA. The

765 number followed by a star indicates which ATG from Fig. 1Supp., ATG<sub>4</sub> corresponding to the

766 annotated ATG. **Tla3 is not required for Hcp2b secretion** (C). Immunodetection of

767 Hcp2b<sub>6His</sub> with anti-His antibodies produced in a WT background (line 1) or in strains deleted

768 for *rsmA* (lines 2 to 4) and *clpV2* (line 3) or *tla3* (line 4). The strains were grown at 25°C for

769 24 h and total bacteria were separated from extracellular medium. Anti-EF-Tu is used as a

770 lysis control. The extracellular medium proteins were also stained with Coomassie-blue. **Tla3**

771 **doesn't interact with Tle4** (D). Copurification assay on StrepTactin column of Tla3<sup>c</sup><sub>STREP</sub>

772 with Tle4<sub>His</sub> produced in *E. coli* BL21(DE3)pLysS from pBB27 and pVT3 respectively.

773 Legend as in Fig. 4. **Tla3 is not secreted** (E). Immunodetection of Tla3<sub>V5</sub> with anti-HV5

774 antibodies produced in a WT background (line 1) or in strain deleted for *rsmA* (line 2). The

775 strains were grown at 25°C for 24 h and total bacteria were separated from extracellular

776 medium. Anti-EF-Tu is used as a lysis control. The extracellular medium proteins were also

777 stained with Coomassie-blue. (A-E) The position of the proteins and the molecular mass

778 markers (in kDa) are indicated.

779 **Fig. 6: *P. aeruginosa* growth competition.** The *P. aeruginosa* prey strain ( $\Delta tli3\Delta tle3$ ) was  
780 incubated with various *P. aeruginosa* attacker strains as indicated in the figure for 24 h at  
781 37°C. The number of recovered prey bacteria is indicated in CFU/ml. “comp” stand for *cis*  
782 complementation of the corresponding mutation with a wild-type copy inserted at the *attB* site  
783 on *P. aeruginosa* chromosome. Error bars represent  $\pm$  SEM (n = 3); \*\*\*p < 0.001, ns not  
784 significant.

785  
786 **Fig. 7: The protease domain of VgrG2b is required for its antibacterial activity.** Serial  
787 dilutions (from non-diluted to  $10^{-5}$ ) of normalized cultures of *E. coli* BL21(DE3)pLys  
788 producing the wild-type C-terminal domain of VgrG2b in the cytoplasm, called CterVgrG2b<sup>C</sup>  
789 (from pBB43, a pETDuet-1 derivate, line 5) or in the periplasm, called CterVgrG2b<sup>P</sup> (from  
790 pBB44, a pET22b(+) derivate yielding a fusion of the C-terminal domain with a Sec signal  
791 peptide, line 2) or two variants CterVgr2b<sup>P</sup><sub>H935A</sub> (from pBB45, line 3) and CterVgr2b<sup>P</sup><sub>E936A</sub>  
792 (from pBB46, line 4) were spotted on LB agar plates supplemented (left panel) with 0.4%  
793 glucose or (right panel) with 0.1mM IPTG. Glucose and IPTG allow respectively repression  
794 and induction of the gene encoding the T7 RNA polymerase.

795  
796 **Fig. 8: Working model: Tle3 targeting to the H2-T6SS machinery (left panel)** Tle3 (in  
797 pink) is taken in charge in the cytoplasm by Tla3 (in orange) that binds VgrG2b (green).  
798 Upon Hcp2b (in dark grey) assembly into the growing sheath (light grey), the VgrG2b loaded  
799 with the Tle3 is placed at the tip of the Hcp arrow. **Tle3 and VgrG2b<sub>Cter</sub> delivery into**  
800 **bacteria (right panel).** The sheath contraction in the cytoplasm propels the Hcp arrow  
801 towards the target bacterium. Tle3 associated with this expelled structure is thus translocated  
802 into target cells, as well as VgrG2b<sub>Cter</sub> (green circle). The prey is killed (Prey<sup>S</sup>) except if it has  
803 the Tli3 immunity (in blue) in the periplasm (Prey<sup>R</sup>). The mechanism of resistance to

804 VgrG2b<sub>Cter</sub> is still unknown. OM: outer membrane, PG: peptidoglycan, IM: inner membrane,

805 BP: base plate, MC: membrane complex. Prey<sup>S</sup>: sensitive prey, Prey<sup>R</sup>: resistant prey.

806

807

# Figure 1

1A.

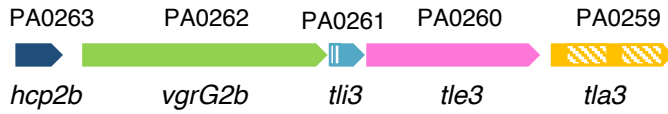

1B.

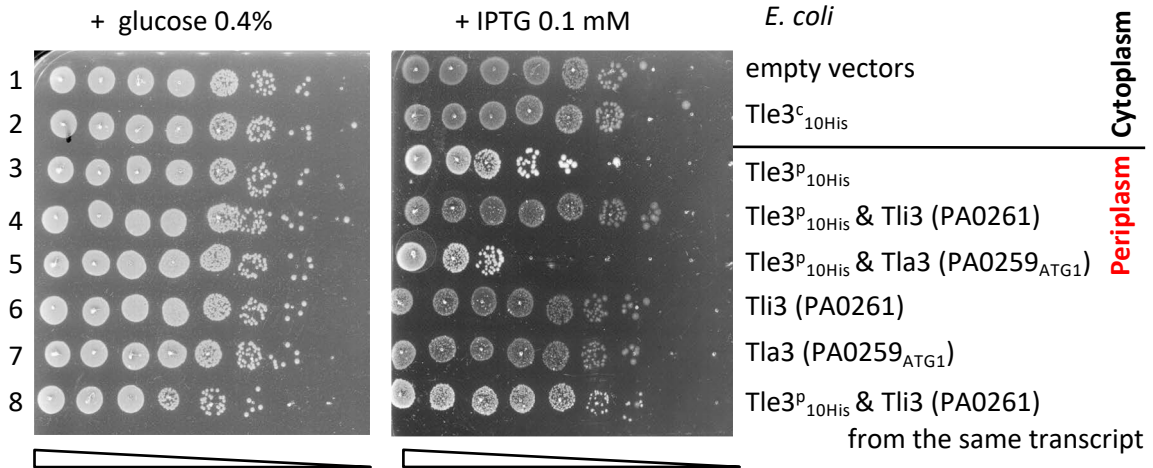

**Figure 2**

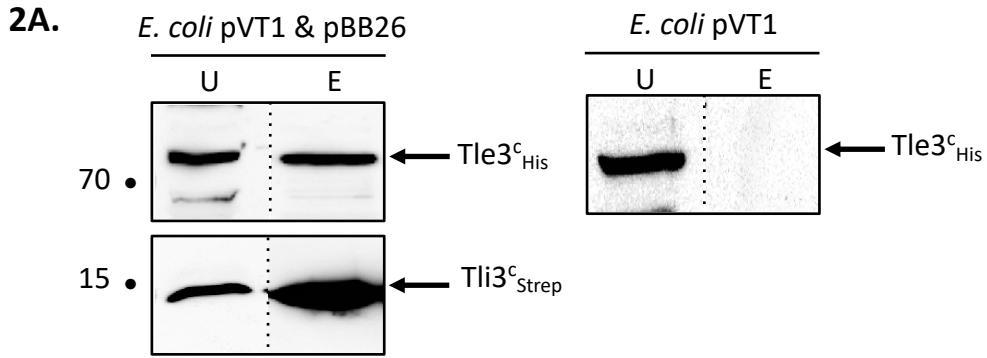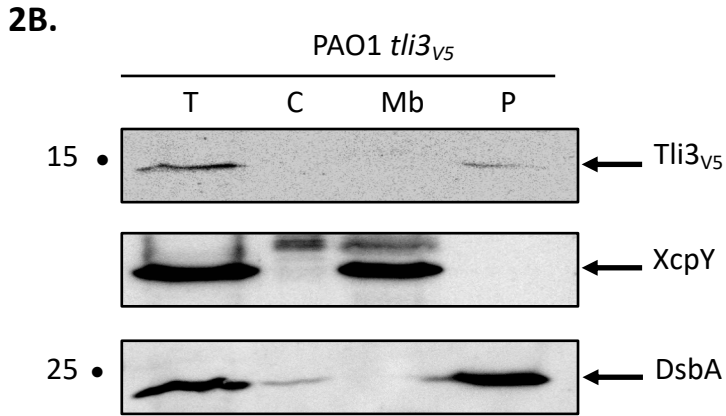



**Figure 3**

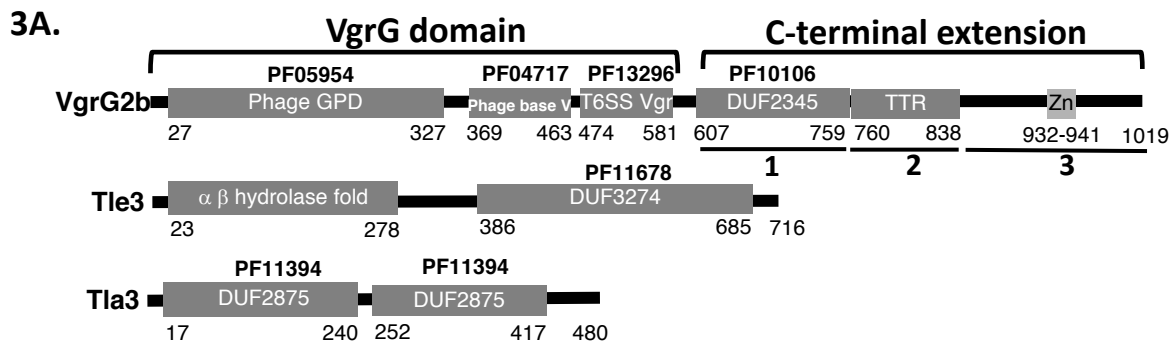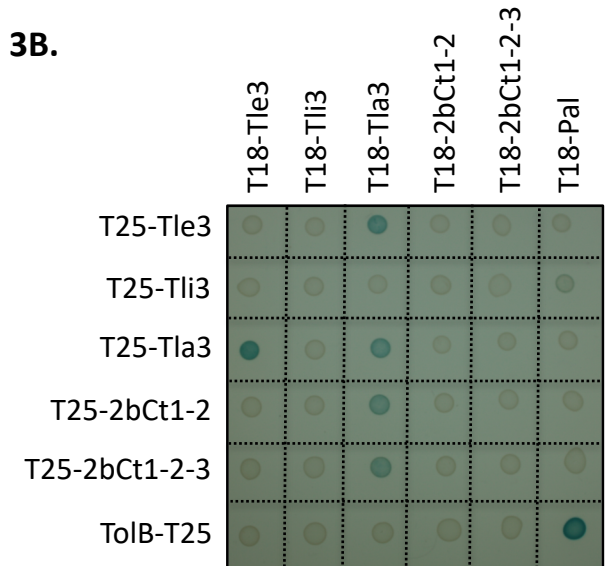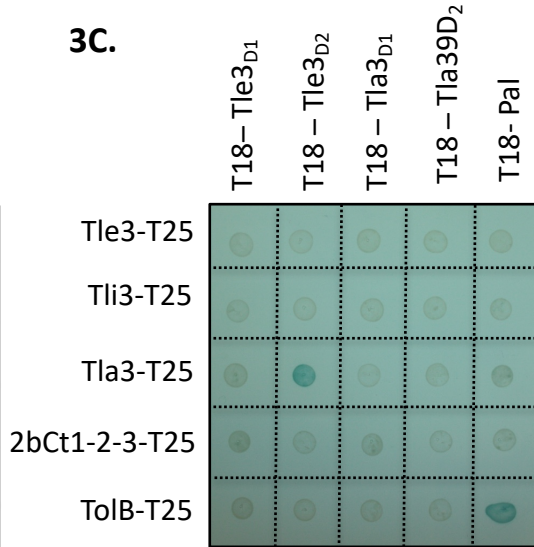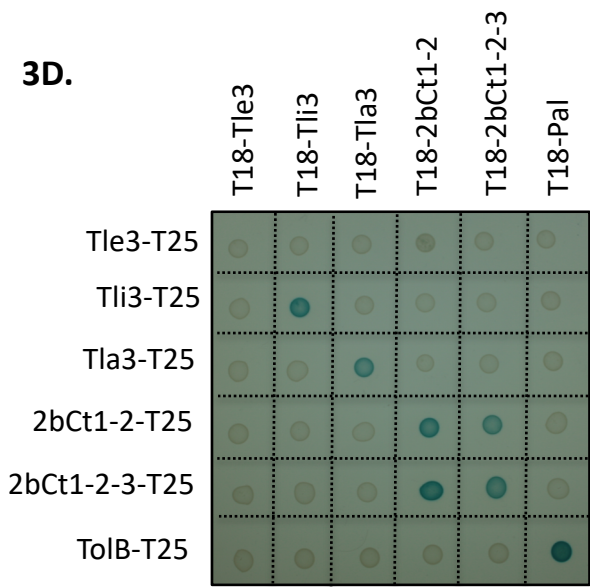

# Figure 4

4A.

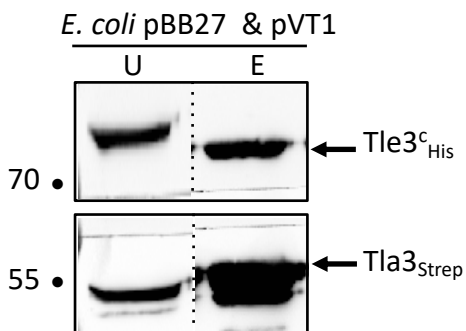

4B.

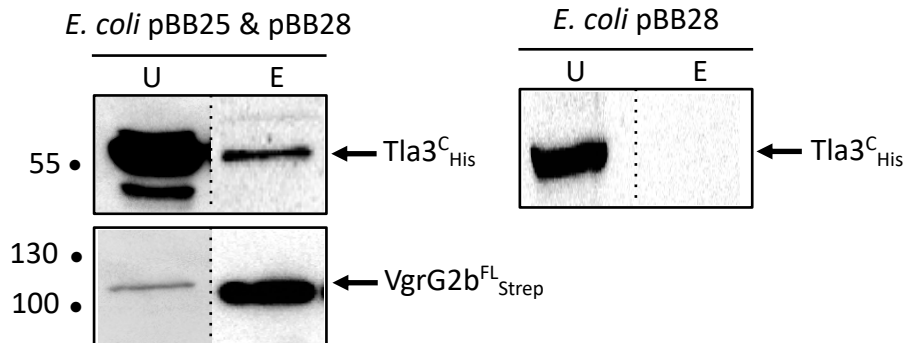

4C.

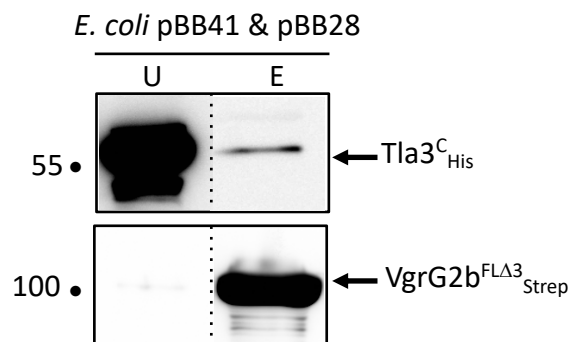

4D.

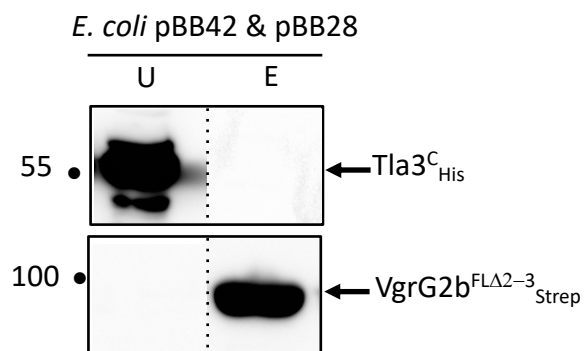

**Figure 5**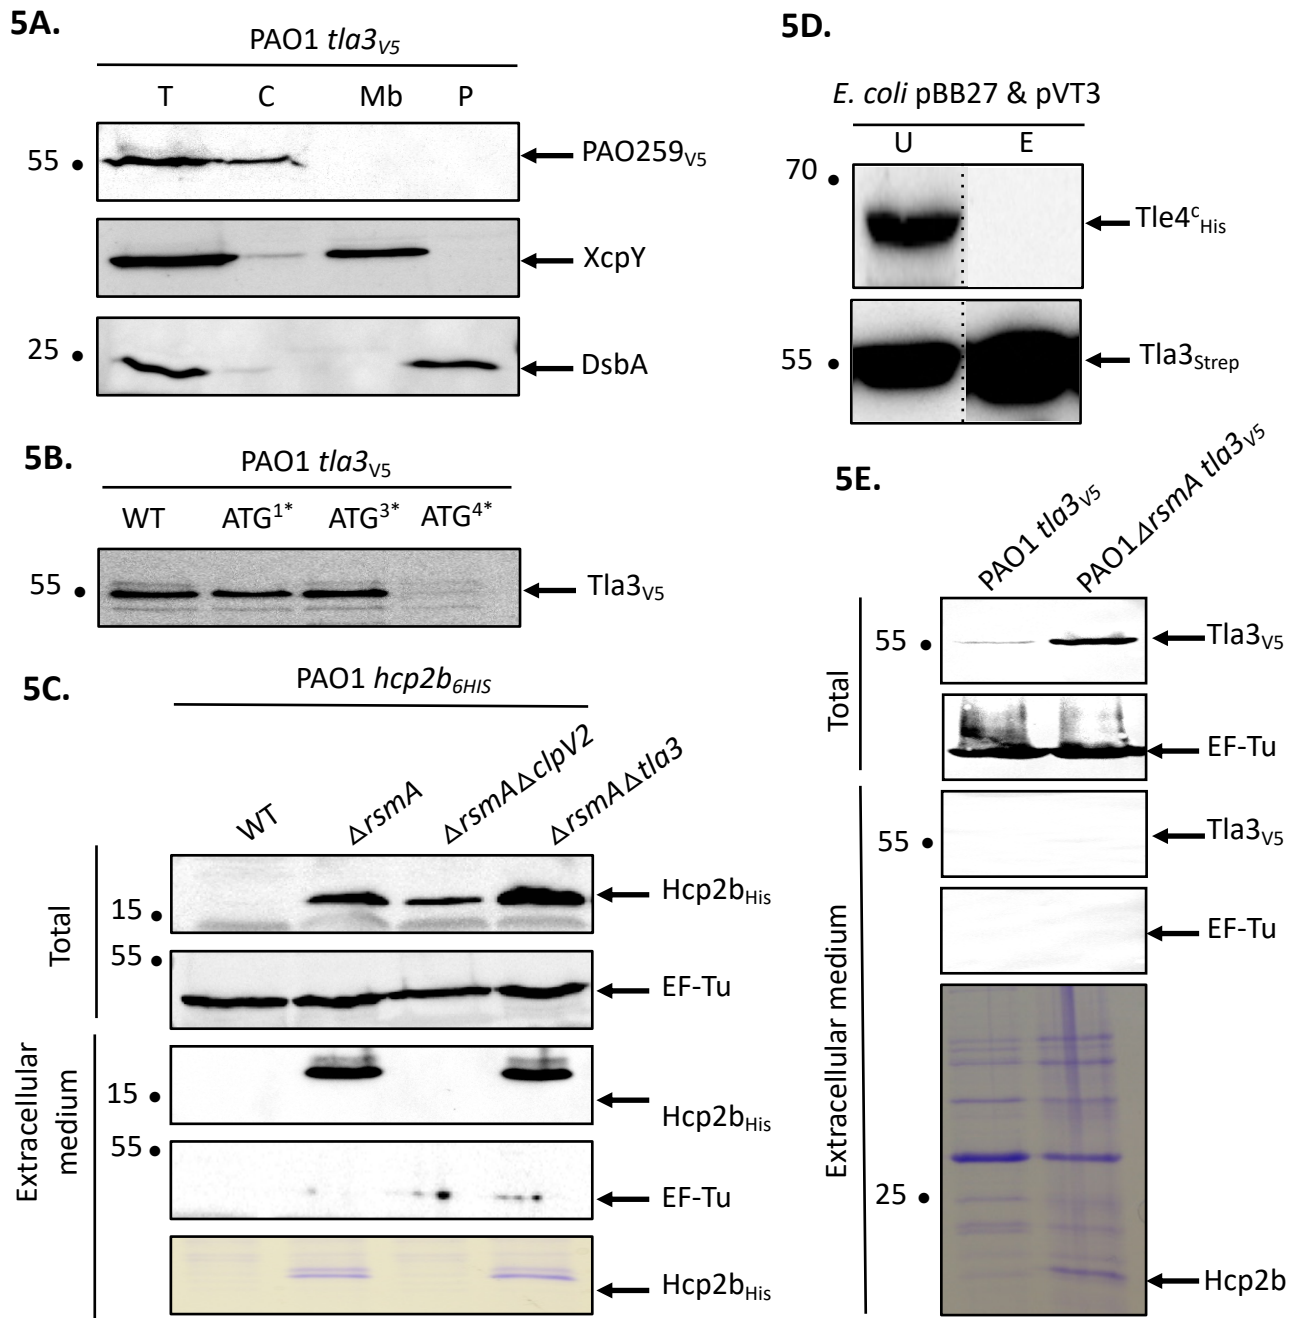

Figure 6

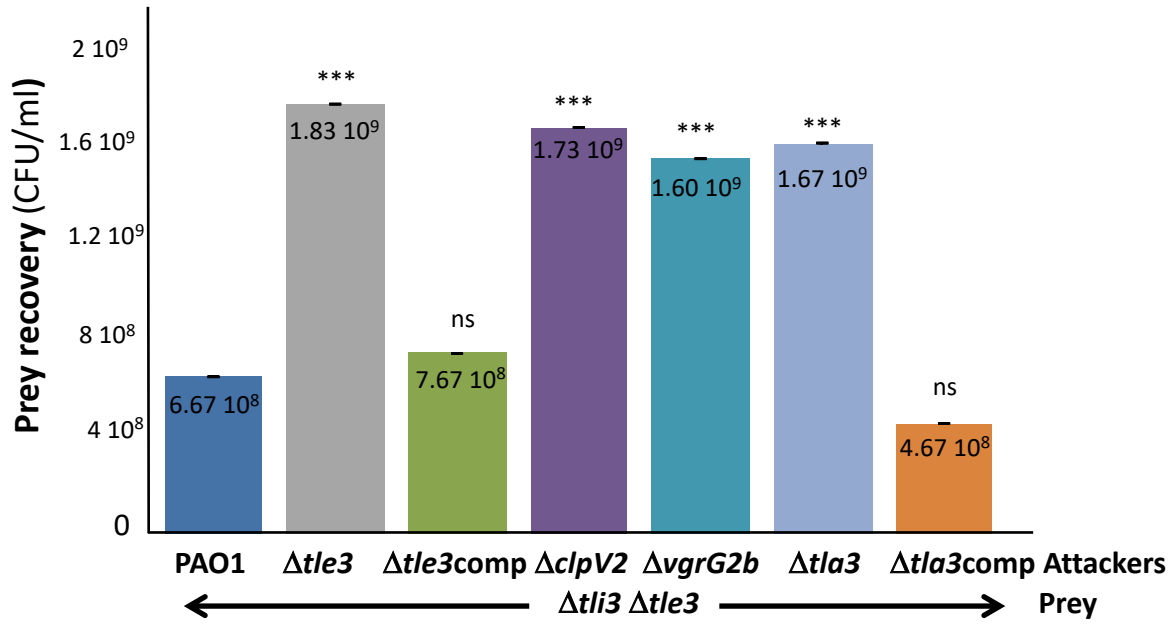

**Figure 7**

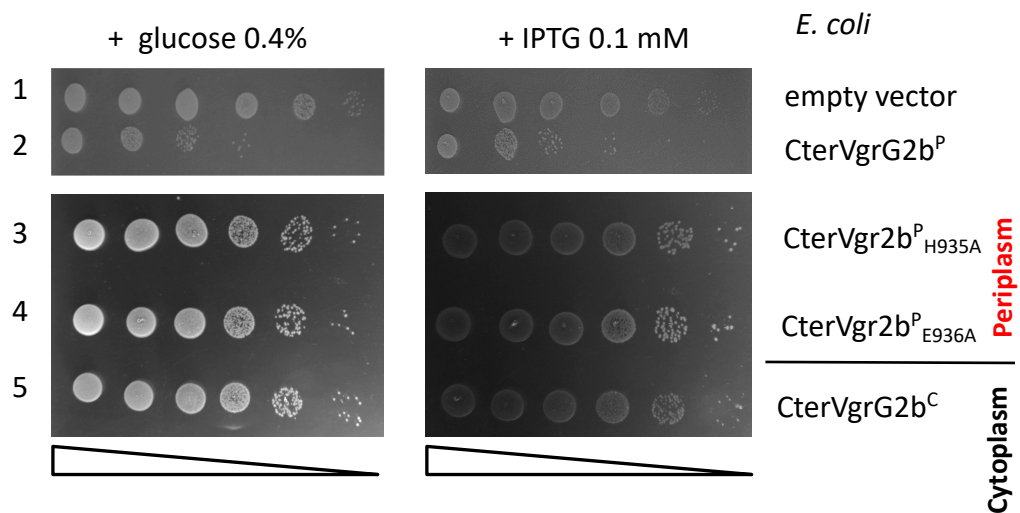

**Figure 8**

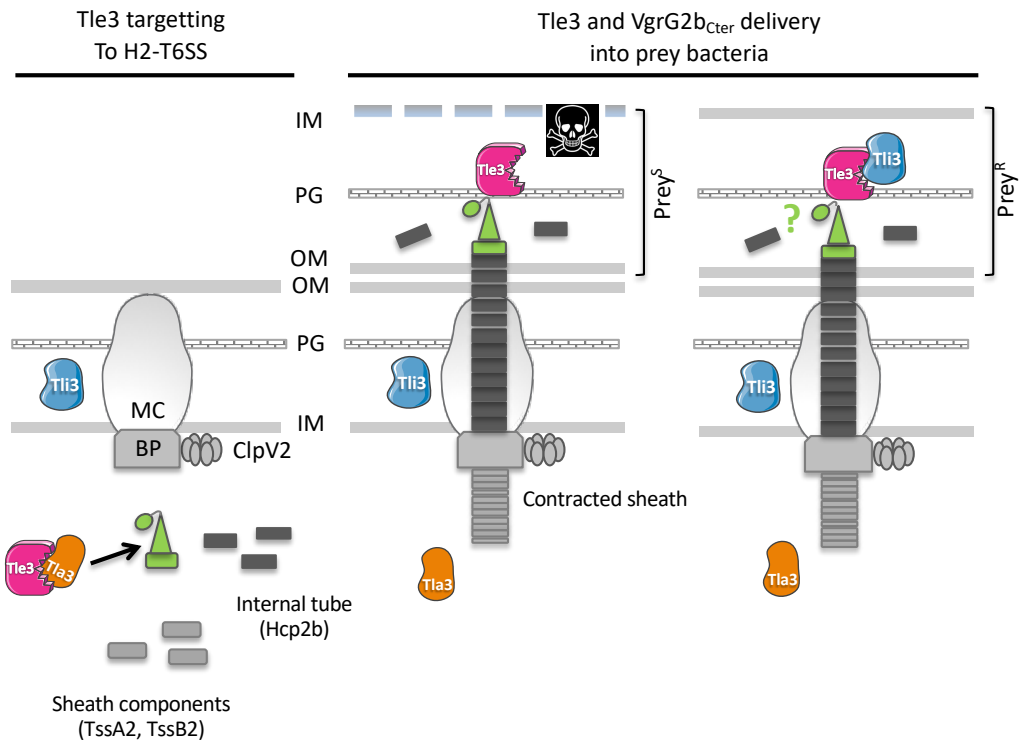

Source: https://biorxiv.org/content/biorxiv/early/2019/02/15/551929.full-text.pdf
